# Supplementary material
Source: PubMed Central journal article supplement (PMC5378501)
Supplement: supp_5.1.E14_2016-0064_original_submission.pdf [file supp_5.1.E14_2016-0064_original_submission.pdf]

May 2, 16

1  
2  
3 Title page  
4

5 Title: CIHR funding of prison health research: Is it enough?  
6  
7

8 Authors: Fiona G. Kouyoumdjian, MD MPH PhD, Kathryn E. McIsaac, MSc PhD,  
9 Jessica E. Foran, MA, Flora I. Matheson, PhD  
10

11 Institutional affiliations: FGK and FIM: Centre for Research on Inner City Health, St.  
12 Michael's Hospital  
13

14 KEM: Research Services, Nova Scotia Health Authority, Halifax, Nova Scotia

15 JEF: Department of Political Science, McMaster University  
16

17 Corresponding author: Fiona Kouyoumdjian, kouyoumdjiaf@smh.ca  
18

19 Funding statement: Fiona Kouyoumdjian receives salary support from a CIHR  
20 Fellowship.  
21  
22

23 Competing interests: None  
24

25 Word count: 2413  
26  
27  
28  
29  
30  
31  
32  
33  
34  
35  
36  
37  
38  
39  
40  
41  
42  
43  
44  
45  
46  
47  
48  
49  
50  
51  
52  
53  
54  
55  
56  
57  
58  
59  
60

**Abstract**

**Background:** The health of prisoners is poor compared to the general population. Health research provides a means to define health status and to identify ways to improve health. The Canadian Institutes of Health Research (CIHR) is the Government of Canada's health research investment agency. We aimed to define the proportion of grants and funding from CIHR for prison health research, that is, research on the health and health care of people in prisons and at the time of release.

**Methods:** We searched the CIHR Funding Decisions Database by subject and by investigator name for funded grants for prison health research in all competitions between 2010 and 2014. We calculated the proportion of grants and funding awarded for prison health research, and described characteristics of funded grants.

**Results:** In this five year period, 21 grants were awarded that included a focus on prison health research, for a total of \$2,289,948. Six of these grants were operating grants and six supported graduate or fellowship training. In total, 0.13% of all grants and 0.05% of all funding was for prison health research.

**Interpretation:** CIHR awarded very little funding for prison health research between 2010 and 2014. Strategic initiatives including funding opportunities could be developed to support prison health research in Canada, which could improve the health and healthcare of prisoners and health in the general population.

May 2, 16

## Introduction

Research is instrumental to understanding and improving the health of individuals and populations. The Canadian Institutes of Health Research (CIHR) is the Government of Canada's health research investment agency, with the mission to create new scientific knowledge and to enable its translation into improved health, more effective health services and products, and a strengthened health care system for Canadians.<sup>1</sup> While Article 15 of the International Covenant of Economic, Social and Cultural Rights, which was ratified by Canada in 1976, identifies the right of all persons "[t]o enjoy the benefits of scientific progress and its applications," health research may not include certain populations and its benefits may not reach some populations, with potentially significant consequences to individual and population health.

In Canada, there are approximately 251,629 adult admissions to provincial and territorial facilities and 8,006 to federal facilities each year,<sup>2</sup> and there is an average of 40,000 people in correctional facilities on any given day.<sup>3</sup> This translates into an estimated 1 in 250 adults who spend time in a correctional facility in Canada each year.<sup>4</sup> Persons who are detained prior to sentencing or who are sentenced to less than two years in custody serve their time in provincial or territorial facilities, and persons who are sentenced to two years or more serve their time in federal facilities. Healthcare in correctional facilities may be delivered by the governmental authority responsible for health, as in Nova Scotia and Alberta, or by the governmental authority responsible for corrections, as in federal facilities and in Ontario.

Research from Canada and other countries reveals that the health of people who experience incarceration is significantly worse than the health of the general population with respect to social determinants of health, mental illness, substance use, mortality, communicable diseases, and intentional and unintentional injuries.<sup>5-7</sup> There is a growing evidence base for strategies to improve the health of this population while in custody and after release to the community,<sup>8</sup> though many of these interventions have not been implemented in Canada.

In this context, we note the lack of health research in Canada that is focused on people who experience incarceration, and particularly the paucity of interventions research.<sup>8,9</sup> In light of the findings of a recent US study,<sup>10</sup> we aimed to investigate the proportion of CIHR grants and funding allocated to research between 2010 and 2014 that is focused on the health and health care of people in prisons and at the time of release, and to describe characteristics of funded grants.

## Methods

*Search:* We developed a search strategy in consultation with an Information Specialist. We searched for prison health research in the CIHR Funding Decisions database using two strategies: i) a search using subject terms, and ii) a search using investigator names. For the search using subject terms, we defined the terms through an iterative process, in which we reviewed relevant abstracts to identify various terms used to describe the population of interest. Our final subject terms were any of the following: prison, imprisonment, jail, detention, incarcerated, incarceration, offender, probation, parole,

1  
2  
3 correctional, convict, inmate, criminal, crime, corrections, détenu, incarcéré, carcéral, but  
4 not the term “troubles de la parole,” which is a French term for speech disorders.  
5  
6

7 To improve the sensitivity of the search, we also conducted a search using the names of  
8 investigators publishing in the field of prison health research. We developed a list of  
9 names of investigators by conducting a search in PubMed (on February 17<sup>th</sup>, 2016) for  
10 prison health research published in 2015, assuming that investigators who received CIHR  
11 funding for prison health would likely be publishing research in this field after their grant  
12 was funded. We used the following search terms in PubMed: ((prison\* OR imprison\* OR  
13 jail\* OR detention OR incarcér\* OR offender\* OR probation OR parole OR correctional  
14 system OR convict\* OR inmate\* OR criminal\* OR crime\*) AND Canada) AND  
15 ("2015/1"[Date - Publication]: "2015/12"[Date - Publication]). We assessed the records  
16 identified in this search as per the review procedures (below), and compiled a list of the  
17 names of first and last authors of prison health research publications. We then searched  
18 the CIHR Funding Decisions database with the name of each investigator in the period of  
19 2010 to 2014 without specifying subject terms.  
20  
21  
22

23 We also searched the CIHR Funding Decisions database for all grants funded by CIHR in  
24 competitions between 2010 and 2014 to define the total number of grants awarded and  
25 the total amount of funding.  
26  
27

28 *Inclusion criteria:* We defined two inclusion criteria: i) an explicit focus on the health  
29 and health care of people in prisons, *i.e.* persons who were detained or incarcerated in  
30 Canada whether in a federal, provincial, or territorial correctional facility, or who had  
31 been released from custody within the past year, and ii) a focus on health as defined by  
32 the Canadian Institute for Health Information,<sup>11</sup> which includes indicators of health  
33 status, determinants of health, and health system performance. In this paper, we use the  
34 summary term “prison health research” to describe PubMed records and grants that meet  
35 these two criteria.  
36  
37

38 *Review procedures:* For the results of the PubMed search to identify investigators  
39 conducting prison health research, two authors (FK and KM) reviewed the titles and  
40 abstracts to determine if the records met the inclusion criteria. If either reviewer thought  
41 that the record was relevant, the investigators’ names were used in the CIHR Funding  
42 Decisions database search.  
43  
44

45 One author (FK) ran the searches in the CIHR Funding Decisions database using the  
46 subject terms and using each investigator name. After eliminating duplicates, two authors  
47 (FK and KM) reviewed all grants to determine whether they met the inclusion criteria.  
48 For grants with no abstract in the database, we contacted the lead investigator to request  
49 further information such as an abstract or summary, and in one case decided on eligibility  
50 based on the title. Any disagreements regarding relevance were resolved through  
51 discussion. For grants that did not meet the inclusion criteria, the authors categorized the  
52 reason why the grant was not eligible. For grants that did meet the inclusion criteria, the  
53 reviewers extracted data on the CIHR Institute that funded the grant and categorized the  
54 subject focus of the grant, *e.g.* mental health, infectious diseases, etc. We also identified  
55  
56  
57  
58  
59  
60

May 2, 16

1  
2  
3 grants that included an explicit focus on prison health research but also had a focus on  
4 other populations or settings, for example, a grant for research focused on people who  
5 were incarcerated as well as on other people who were involved in the criminal justice  
6 system but not incarcerated; we assumed that at least a proportion of each of these grants  
7 would be targeted toward prison health research.  
8  
9

## 10 **Results**

11 The PubMed search to identify investigators conducting prison health research yielded  
12 308 records. Of these, 25 records met the inclusion criteria, from which we identified 44  
13 unique investigators. As shown in Figure 1, the search by investigator name in the CIHR  
14 Funding Decisions database identified 52 funded grants in total and 50 unique grants. The  
15 search by subject in the CIHR Funding Decisions database identified 133 funded grants,  
16 9 of which were also identified in the subject search. In total therefore, there were 174  
17 unique grants identified in the subject and investigator searches.  
18  
19

20  
21 Of the 133 grants identified in the subject search, 112 did not meet the inclusion criteria  
22 for the following reasons: 48 noted that incarceration or other criminal justice  
23 involvement was prevalent or associated with the population or condition under study  
24 (e.g. disease or social determinant) but did not focus on prison health research, 16  
25 focused on persons in contact with the criminal justice system but not clearly persons  
26 who experienced incarceration, 11 were about the criminalization of HIV nondisclosure,  
27 five were not focused on Canada, two studied populations affected by incarceration or  
28 crime such as children of incarcerated women or survivors of sexual assault, two intended  
29 to measure the impact of an intervention on incarceration or criminal justice involvement,  
30 17 had unintended keyword matches such as “correctional surgery” or “conviction” about  
31 an idea, and 11 did not meet the inclusion criteria for other reasons. The search using  
32 investigator names did not identify any additional grants that were relevant.  
33  
34

35  
36 We identified 18 grants for prison health research, and the total funding for these grants  
37 was \$2,127,948. Three other grants included an explicit focus on prison health research  
38 along with a focus on other populations or settings, so 21 grants in total focused on prison  
39 health research representing \$2,289,948 of funding. In all competitions between 2010 and  
40 2014, CIHR funded 16,336 grants for a total of \$4,520,974,400. Therefore, 0.13% of all  
41 grants and 0.05% of all funding was spent on prison health research.  
42  
43

44  
45 Table 1 shows the characteristics of the 21 grants that included a focus on prison health  
46 research. Only six operating grants were funded in prison health research during this five-  
47 year period. Most grants had a disease-specific focus, such as mental illness or  
48 bloodborne infections, and a minority of grants had a broader focus, such as health status  
49 or health care. The Institute for Population and Public Health funded the largest number  
50 of grants (n=7) and the Institute of Human Development, Child and Youth Health  
51 provided the largest amount of funding (\$698,011).  
52  
53  
54  
55  
56  
57  
58  
59  
60

Table 1. Characteristics of CIHR funded grants between 2010 and 2014 on prison health research, N=21\*

| Characteristic | Number                                     | Funding |             |
|----------------|--------------------------------------------|---------|-------------|
| Grant type     | operating                                  | 6       | \$1,237,944 |
|                | planning or knowledge dissemination        | 6       | \$215,659   |
|                | catalyst                                   | 3       | \$98,845    |
|                | graduate or fellowship training funding    | 6       | \$647,500   |
| Subject        | mental health                              | 8       | \$1,596,611 |
|                | bloodborne infections                      | 3       | \$85,520    |
|                | health status                              | 3       | \$149,171   |
|                | social determinants of health              | 2       | \$55,313    |
|                | health care                                | 2       | \$39,336    |
|                | self-harm                                  | 1       | \$105,000   |
|                | substance use                              | 1       | \$93,997    |
|                | mortality                                  | 1       | \$165,000   |
| CIHR Institute | Population and Public Health               | 7       | \$447,698   |
|                | Health Sciences and Policy Research        | 3       | \$344,582   |
|                | Aboriginal Peoples' Health                 | 2       | \$55,313    |
|                | Human Development, Child and Youth Health  | 2       | \$698,011   |
|                | Infection and Immunity                     | 2       | \$65,845    |
|                | Neurosciences, Mental Health and Addiction | 2       | \$449,018   |
|                | Gender and Health                          | 1       | \$105,000   |

\*displayed by number of grants funded

### Interpretation

For every hundred dollars of funding from CIHR, less than five cents was spent on prison health research between 2010 and 2014. About one in every 1000 grants was for prison health research, and the total funding per year for prison health research was less than \$500,000 during this period. The absolute and proportional levels of CIHR funding for prison health research are remarkably low.

What amount of CIHR funding would be appropriate for prison health research and how should this be decided? A recent US study identified a similarly low level of funding for criminal justice health research, at less than 0.1% of all grants funded by the National Institutes of Health between 2008 and 2012, and 0.1% of all funding awarded in 2012. While it is difficult to define an appropriate level of funding for research on any population or disease, surely we should have transparent strategies in place to systematically identify and support areas of research that are important for Canada,<sup>12, 13</sup> for example in consideration of the size of the affected populations, the burden of disease, potential impact on important outcomes, equity, and the political and legal context.<sup>14</sup> If we can agree that prison health research is a priority for Canada on the basis of these or other criteria, we should identify and implement pull and push mechanisms to support this focus,<sup>15</sup> including targeted funding opportunities, training and early/mid-career awards, prizes for research, and ways to facilitate research in correctional facilities.

May 2, 16

1  
2  
3 Defining such strategies should include persons who are involved in advocacy and  
4 research focused on prison health, including people with a history of incarceration,  
5 consistent with CIHR's Framework for Citizen Engagement and Strategic Plan.<sup>13, 16</sup>  
6  
7

8 There are several potential limitations to this study. Information on all submitted grants is  
9 not publicly available, so we do not know whether the low level of funding reflects a lack  
10 of submitted proposals on prison health research. We considered funding from CIHR as  
11 an indicator of federal government support for prison health research, however, there are  
12 other avenues for the federal government to financially support prison health research  
13 such as indirect support through funding the Correctional Service of Canada. It is also  
14 possible that prison health research was directly supported through the Social Sciences  
15 and Humanities Research Council (SSHRC), although this is unlikely since the eligibility  
16 criteria for the Social Sciences and Humanities Research Council (SSHRC) changed to  
17 exclude most health research in 2009.<sup>17</sup> Research focused on other populations and other  
18 settings may have relevance to people in correctional facilities, including subpopulations  
19 that are disproportionately represented in correctional facilities such as people who use  
20 drugs and Indigenous persons.<sup>5, 6</sup> However, important differences in context and in the  
21 legal status of people in prisons and post-release may limit the generalizability of other  
22 research to this population and setting.  
23  
24  
25  
26

27 In addition to the issue of funding, advancing prison health research requires examining  
28 and addressing the unique challenges, constraints and ethical issues of conducting  
29 research in correctional settings and with vulnerable populations.<sup>8, 18</sup> Beyond the shadow  
30 of the ethically unacceptable research in prisons in the past century, we need to pay  
31 attention to obtaining voluntary consent to participation in research,<sup>19, 20</sup> to privacy, and  
32 that participation does not cause harm (for example by limiting one's access to health or  
33 other services while incarcerated).<sup>9</sup> We need to work with external institutional review  
34 boards who may not be familiar with contemporary research issues with this population  
35 and in this setting, in the context of a lack of specific guidance in Canada on how to  
36 address these matters.<sup>21</sup> For example, in the US the Institute of Medicine and the National  
37 Academy of Sciences have published a guide to the ethical conduct of research with  
38 prisoners, which describes the roles and responsibilities of researchers, institutions, and  
39 institutional review boards.<sup>19</sup> Other institutional barriers include the need for and costs of  
40 security staff to supervise research activities, and that research may not fit within and  
41 may even conflict with the mandate of corrections. It may be difficult to follow research  
42 participants through transfers between institutions and across jurisdictions, as well as into  
43 the community after release from custody. Finally, access issues pose challenges to  
44 including people during incarceration in developing and implementing research, though  
45 this has been achieved with impressive results by at least one group of researchers in  
46 Canada.<sup>22</sup>  
47  
48  
49  
50  
51

52 These challenges notwithstanding, there are many reasons to focus on and invest in  
53 prison health research in Canada. As noted, this is a large population with poor health,  
54 and the government has a legal and ethical obligation to provide health care for this  
55  
56  
57  
58  
59  
60

1  
2  
3  
4  
5  
6  
7  
8  
9  
10  
11  
12  
13  
14  
15  
16  
17  
18  
19  
20  
21  
22  
23  
24  
25  
26  
27  
28  
29  
30  
31  
32  
33  
34  
35  
36  
37  
38  
39  
40  
41  
42  
43  
44  
45  
46  
47  
48  
49  
50  
51  
52  
53  
54  
55  
56  
57  
58  
59  
60

population while in custody, which should be equivalent to the standard of care in the community.<sup>23-25</sup> We know that effective interventions exist,<sup>8</sup> and further work is needed to elucidate how best to intervene to improve health and to adapt and implement promising interventions in particular settings in Canada. Improving the health of this population could reduce health disparities, contribute to public health through less transmission of communicable diseases, improve public safety through the treatment of substance use disorders and mental illness, and lower costs of re-incarceration and inappropriate health care utilization.<sup>26</sup> We call on the CIHR and the federal, provincial, and territorial governments to consider appropriate and fair ways to support prison health research in Canada as an important strategy to improve population health.

### Acknowledgments

We appreciate Carolyn Ziegler's contributions to the development of the search strategy.

### References

1. Canadian Institutes of Health Research. Our mandate. 2013. <http://www.cihr-irsc.gc.ca/e/7263.html> (Accessed March 9 2016).
2. Perrault S. Admissions to adult correctional services in Canada, 2011/2012. 2014. <http://www.statcan.gc.ca/pub/85-002-x/2014001/article/11918-eng.htm> - a2 (Accessed December 14 2014).
3. Walmsley R. World prison population list, 10th edition. London: King's College London International Centre for Prison Studies, 2013.
4. Kouyoumdjian FG, McIsaac KE. Persons in correctional facilities in Canada: A key population for hepatitis C prevention and control. *Canadian journal of public health = Revue canadienne de sante publique* 2015; **106**(6): e454-6.
5. Fazel S, Baillargeon J. The health of prisoners. *Lancet* 2011; **377**(9769): 956-65.
6. Kouyoumdjian F, Schuler A, Hwang SW, Matheson FI. The health status of prisoners in Canada: A narrative review. *Canadian Family Physician* 2016; **62**(3): 215-22.
7. Kouyoumdjian F, Kiefer L, Wobeser W, Hwang SW. High mortality over 12 years of follow up in people admitted to provincial custody in Ontario: A retrospective cohort study. *Canadian Medical Association Journal Open* 2016; **4**(2): E153-E61.
8. Kouyoumdjian FG, McIsaac KE, Liauw J, et al. A systematic review of randomized controlled trials of interventions to improve the health of persons during imprisonment and in the year after release. *Am J Public Health* 2015; **105**(4): e13-33.
9. Kouyoumdjian FG, Schuler A, Hwang SW, Matheson FI. Research on the health of people who experience detention or incarceration in Canada: a scoping review. *BMC Public Health* 2015; **15**: 419.
10. Ahalt C, Bolano M, Wang EA, Williams B. The state of research funding from the National Institutes of Health for criminal justice health research. *Annals of internal medicine* 2015; **162**(5): 345-52.
11. Canadian Institute for Health Information. Health Indicators 2012. 2012. [https://secure.cihi.ca/free\\_products/health\\_indicators\\_2012\\_en.pdf](https://secure.cihi.ca/free_products/health_indicators_2012_en.pdf).
12. Chalmers I, Bracken MB, Djulbegovic B, et al. How to increase value and reduce waste when research priorities are set. *Lancet* 2014; **383**(9912): 156-65.



May 2, 16

13. Canadian Institutes of Health Research. Health Research Roadmap II: Capturing Innovation to Produce Better Health and Health Care for Canadians: Strategic Plan 2014-15 - 2018-19. 2015. <http://www.cihr-irsc.gc.ca/e/48964.html> (Accessed April 26 2016).
14. Erickson LJ, De Wals P, Farand L. An analytical framework for immunization programs in Canada. *Vaccine* 2005; **23**(19): 2470-6.
15. Mueller-Langer F. Neglected infectious diseases: are push and pull incentive mechanisms suitable for promoting drug development research? *Health economics, policy, and law* 2013; **8**(2): 185-208.
16. Canadian Institutes of Health Research. Citizen engagement. 2012. <http://www.cihr-irsc.gc.ca/e/41592.html> (Accessed April 26 2016).
17. Social Sciences and Humanities Research Council. Subject Matter Eligibility. 2014. [http://www.sshrc-crsh.gc.ca/funding-financement/apply-demande/background-reseignements/selecting\\_agency-choisir\\_organisme\\_subventionnaire-eng.aspx - af3](http://www.sshrc-crsh.gc.ca/funding-financement/apply-demande/background-reseignements/selecting_agency-choisir_organisme_subventionnaire-eng.aspx - af3) (Accessed March 20 2016).
18. Quina K, Garis AV, Stevenson J, et al. Through the bullet-proof glass: conducting research in prison settings. *Journal of trauma & dissociation : the official journal of the International Society for the Study of Dissociation* 2007; **8**(2): 123-39.
19. Gostin L. Ethical Considerations for Research Involving Prisoners. Washington, D.C.: Insitute of Medicine, 2007.
20. Levine RJ. Ethics and regulation of clinical research, second edition. New Haven: Yale University Press; 1988.
21. Canadian Institutes of Health Research, National Sciences and Engineering Research Council of Canada, and Social Sciences and Humanities Research Council of Canada. Tri-Council Policy Statement: Ethical Conduct for Research Involving Humans. 2010. [http://www.pre.ethics.gc.ca/pdf/eng/tcps2/TCPS\\_2\\_FINAL\\_Web.pdf](http://www.pre.ethics.gc.ca/pdf/eng/tcps2/TCPS_2_FINAL_Web.pdf).
22. Elwood Martin R, Murphy K, Hanson D, Hemingway C, Ramsden V, Buxton J, Granger-Brown A, Condello LL, Buchanan M, Espinoza-Magana N, Edworthy G, Hislop TG. The development of participatory health research among incarcerated women in a Canadian prison. *International Journal of Prisoner Health* 2009; **5**(2): 95-107.
23. Wilson S. The principle of equivalence and the future of mental health care in prisons. *The British journal of psychiatry : the journal of mental science* 2004; **184**: 5-7.
24. Government of Canada. Canada Health Act, 1985. Available at: <http://laws-lois.justice.gc.ca/eng/acts/C-6/FullText.html> (Accessed: November 25, 2014).
25. United Nations General Assembly. Basic Principles for the Treatment of Prisoners, 1990. Available at: <http://www.un.org/documents/ga/res/45/a45r111.htm> (Accessed: February 1, 2015).
26. Kinner S, Wang EA. The case for improving the health of ex-prisoners. *American Journal of Public Health* 2014; **104**(8): 1352-5.

Figure 1. Flow diagram of search for CIHR grants on prison health, 2010-2014



Confidential

1  
2  
3  
4  
5  
6  
7  
8  
9  
10  
11  
12  
13  
14  
15  
16  
17  
18  
19  
20  
21  
22  
23  
24  
25  
26  
27  
28  
29  
30  
31  
32  
33  
34  
35  
36  
37  
38  
39  
40  
41  
42  
43  
44  
45  
46  
47  
48  
49  
50  
51  
52  
53  
54  
55  
56  
57  
58  
59  
60
